# Supplementary material for: KSHV transactivator-derived small peptide traps coactivators to attenuate MYC and inhibits leukemia and lymphoma cell growth
Source: PubMed Central journal article supplement (PMC8639922; doi:10.1038/s42003-021-02853-0), 2021-12-02

# KSHV transactivator-derived small peptide traps coactivators to attenuate MYC and inhibits leukemia and lymphoma cell growth

Michiko Shimoda<sup>1, 2, \*</sup>, Yuanzhi Lyu<sup>1</sup>, Kang-Hsin Wang<sup>1</sup>, Ashish Kumar<sup>1</sup>, Hiroki Miura<sup>1</sup>, Joshua F. Meckler<sup>2, 3</sup>, Ryan R. Davis<sup>4</sup>, Chanikarn Chantarasrivong<sup>5</sup>, Chie Izumiya<sup>1</sup>, Clifford G. Tepper<sup>2, 6</sup>, Ken-ichi Nakajima<sup>1</sup>, Joseph Tuscano<sup>2, 3</sup>, Gustavo Barisone<sup>2, 3</sup>, & Yoshihiro Izumiya<sup>1, 2, 6,\*</sup>

<sup>1</sup> Department of Dermatology, School of Medicine, University of California Davis (UC Davis), Sacramento

<sup>2</sup> UC Davis Comprehensive Cancer Center, Sacramento, California USA

<sup>3</sup> Department of Internal Medicine, School of Medicine, UC Davis, Sacramento

<sup>4</sup> Department of Pathology and Laboratory Medicine, School of Medicine, UC Davis, Sacramento

<sup>5</sup> Lifematics Inc. Osaka Japan

<sup>6</sup> Department of Biochemistry and Molecular Medicine, School of Medicine, UC Davis, Sacramento

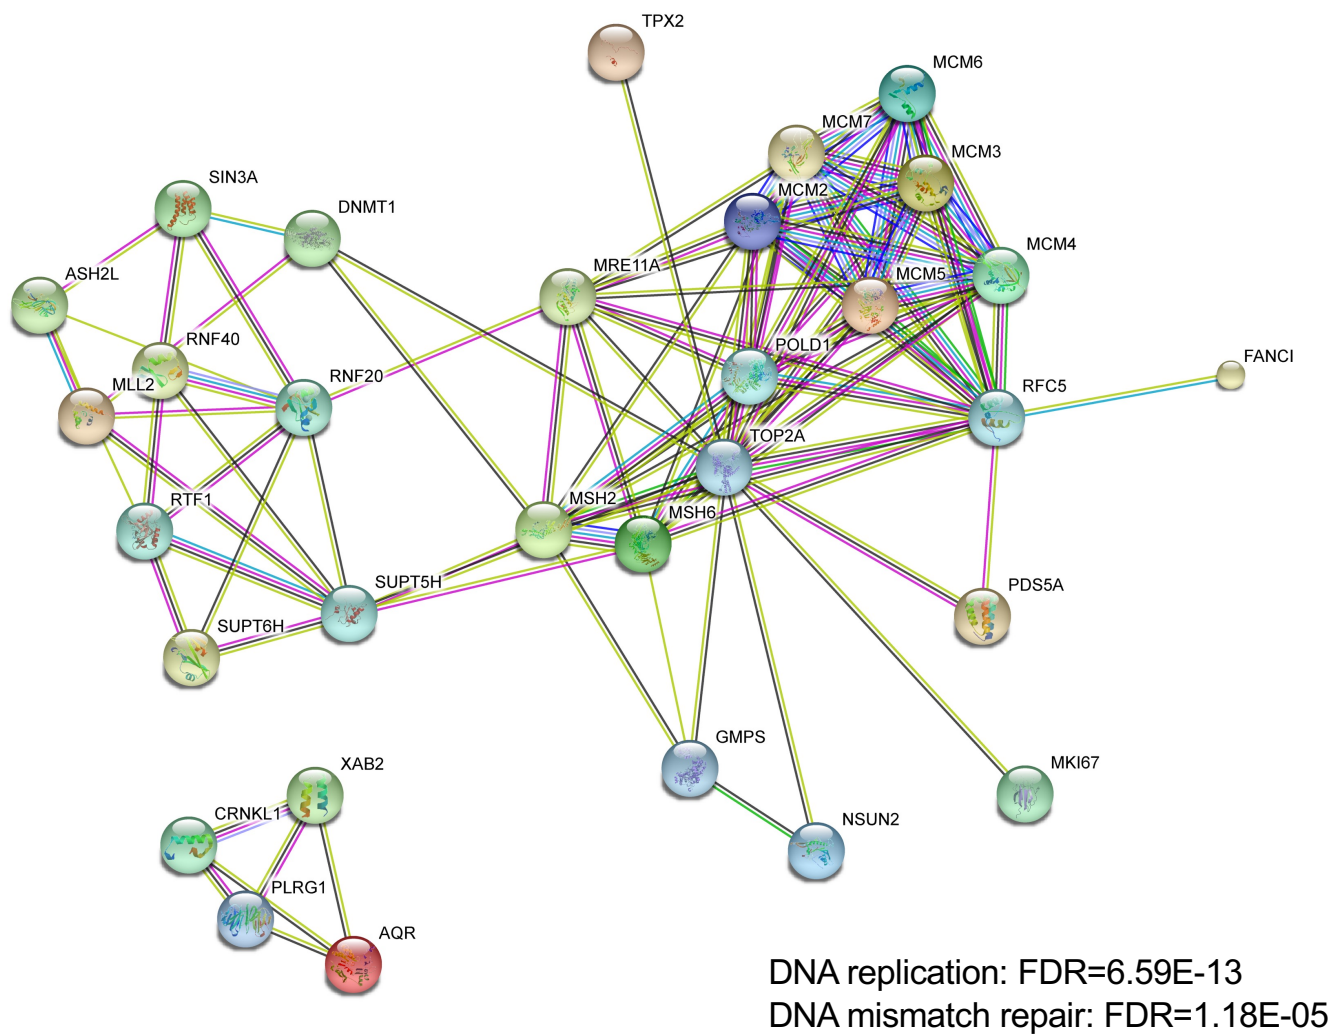

**S-Figure 1. Protein dissociated from RNAPII during reactivation.** Average of peptides counts that are 1.5x less than non-reactivated samples were plotted with STRING.

**a**

| Other herpesvirus & Bacteria          | Alignment/protein seq.                                                                |
|---------------------------------------|---------------------------------------------------------------------------------------|
| KSHV ORF50 (ADQ57929.1):              | DDALL <u>S</u> <b>S</b> <u>I</u> L <u>Q</u> G <u>L</u> Y <u>Q</u> L <b>D</b> <b>T</b> |
| LysR Bacteria TF (WP193632878.1):     | KAQ-LPDIL <u>Q</u> G <u>L</u> Y <u>Q</u> L <b>T</b> <b>Q</b>                          |
| Saimiriine GHV2 (CAC85015.1):         | DDNILAS <u>I</u> L <u>Q</u> D <u>L</u> Y <u>D</u> L <b>P</b> A                        |
| Macaca Nemerha Virus (YP010084594.1): | DDDMLAA <u>I</u> L <u>Q</u> D <u>L</u> Y <u>G</u> L <b>Q</b> S                        |
| Bovine GHV4 (NP076541.1):             | EDAYLEL <u>I</u> L <u>Q</u> G <u>L</u> Y <u>H</u> L <b>D</b> E                        |
| Retrofibro.GHV (YP010084411.1):       | DDELL <u>S</u> T <u>I</u> L <u>Q</u> G <u>L</u> Y <u>Q</u> L <b>D</b> E               |
| Colobine GHV1 (QDQ69256.1):           | DE <u>D</u> LL <u>S</u> A <u>I</u> L <u>Q</u> G <u>L</u> Y <u>Q</u> L <b>D</b> E      |
| Rhesus radinovirus (AAF60029.1).      | DDDMLAA <u>I</u> L <u>Q</u> D <u>L</u> Y <u>G</u> L <b>Q</b> S                        |

**b**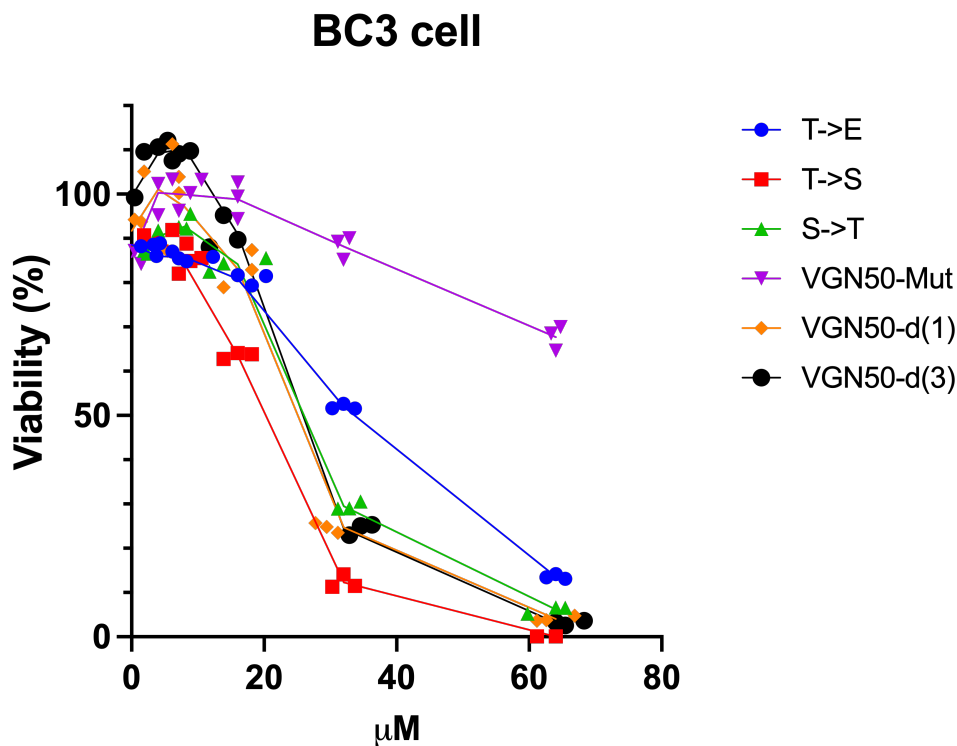

**S-Figure 2. (a) Consensus sequences observed at ORF50 transactivation domain with other gamma-herpesviral homologous proteins and a bacterial transcriptional factor.** Essential amino acid residue for MYC cell growth inhibition identified in this study is underlined. Conserved amino acid residues are also marked in bold case. **(b) Exchangeable amino acid indicates conserved function with other gamma-herpesvirus family homologous protein.** Amino acids residues that are exchangeable to corresponding amino acid in other herpesvirus without any loss of cell killing in MTT assays were indicated in red (T->E, T->S, S->T). Additionally changing two C-terminal amino acids to D-amino acid (d3) did not increase efficacies of peptide cell killing in vitro.



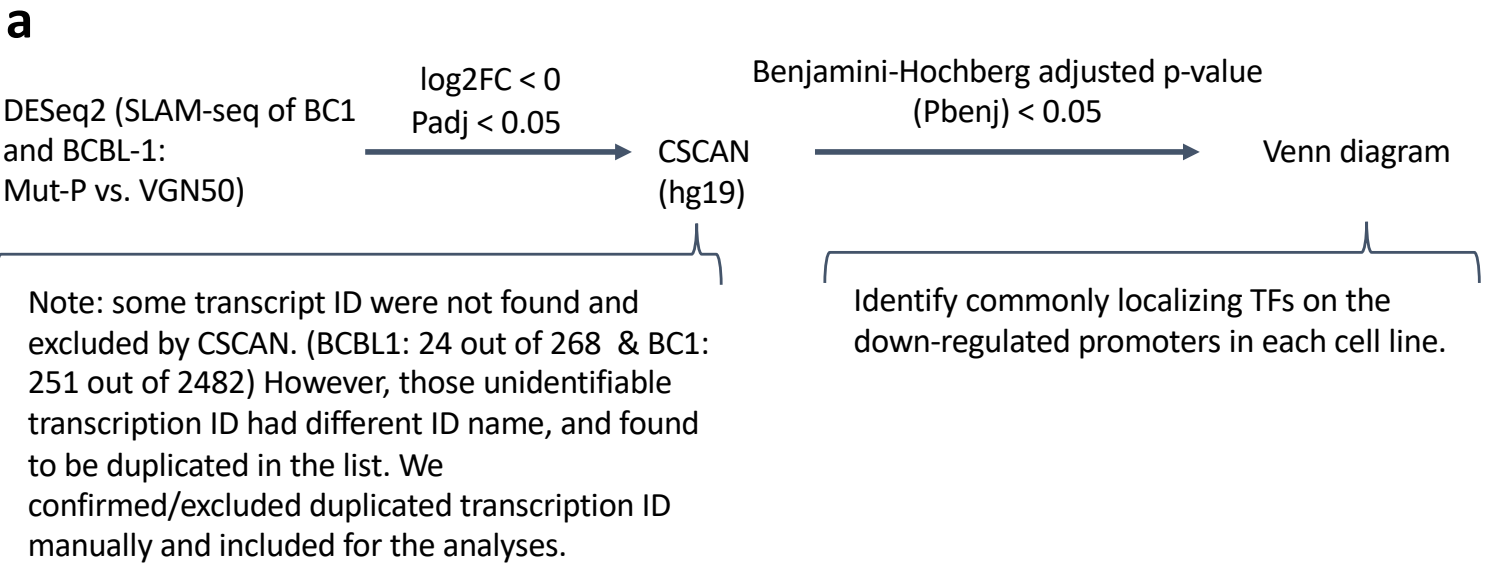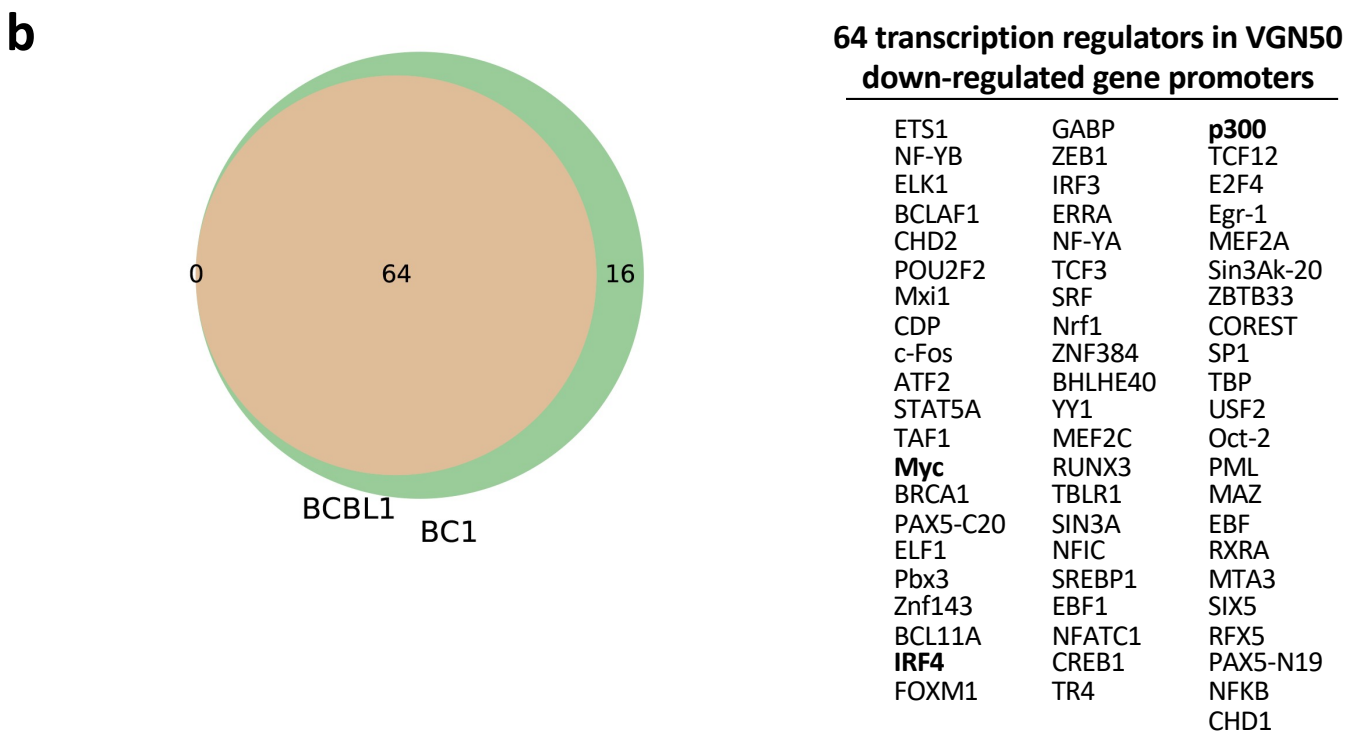

**S-Figure 4. List of putative target transcription regulators of VGN50. (a)** Schematic analysis flow for identification of VGN50 targets. Transcription targets were determined by differential transcriptional output between VGN50Mut and VGN50Wt treated cells. After the transcription targets were filtered with indicated cut-off criteria, they were submitted to CSCAN to identify common regulators. The commonly targeted transcription regulators of 2 cell lines were shown as Venn diagram. **(b) Venn diagram and putative VGN50-target transcription regulators.** Number of protein identified is indicated in Venn diagram (left) and list of protein names that are commonly identified between two cell lines were depicted in table (right). Three protein that are known to play important role in PEL cell growth (c-Myc and IRF4) and a protein identified in the targeted coactivator complex (p300 in Fig. 1b) are indicated with bold face.

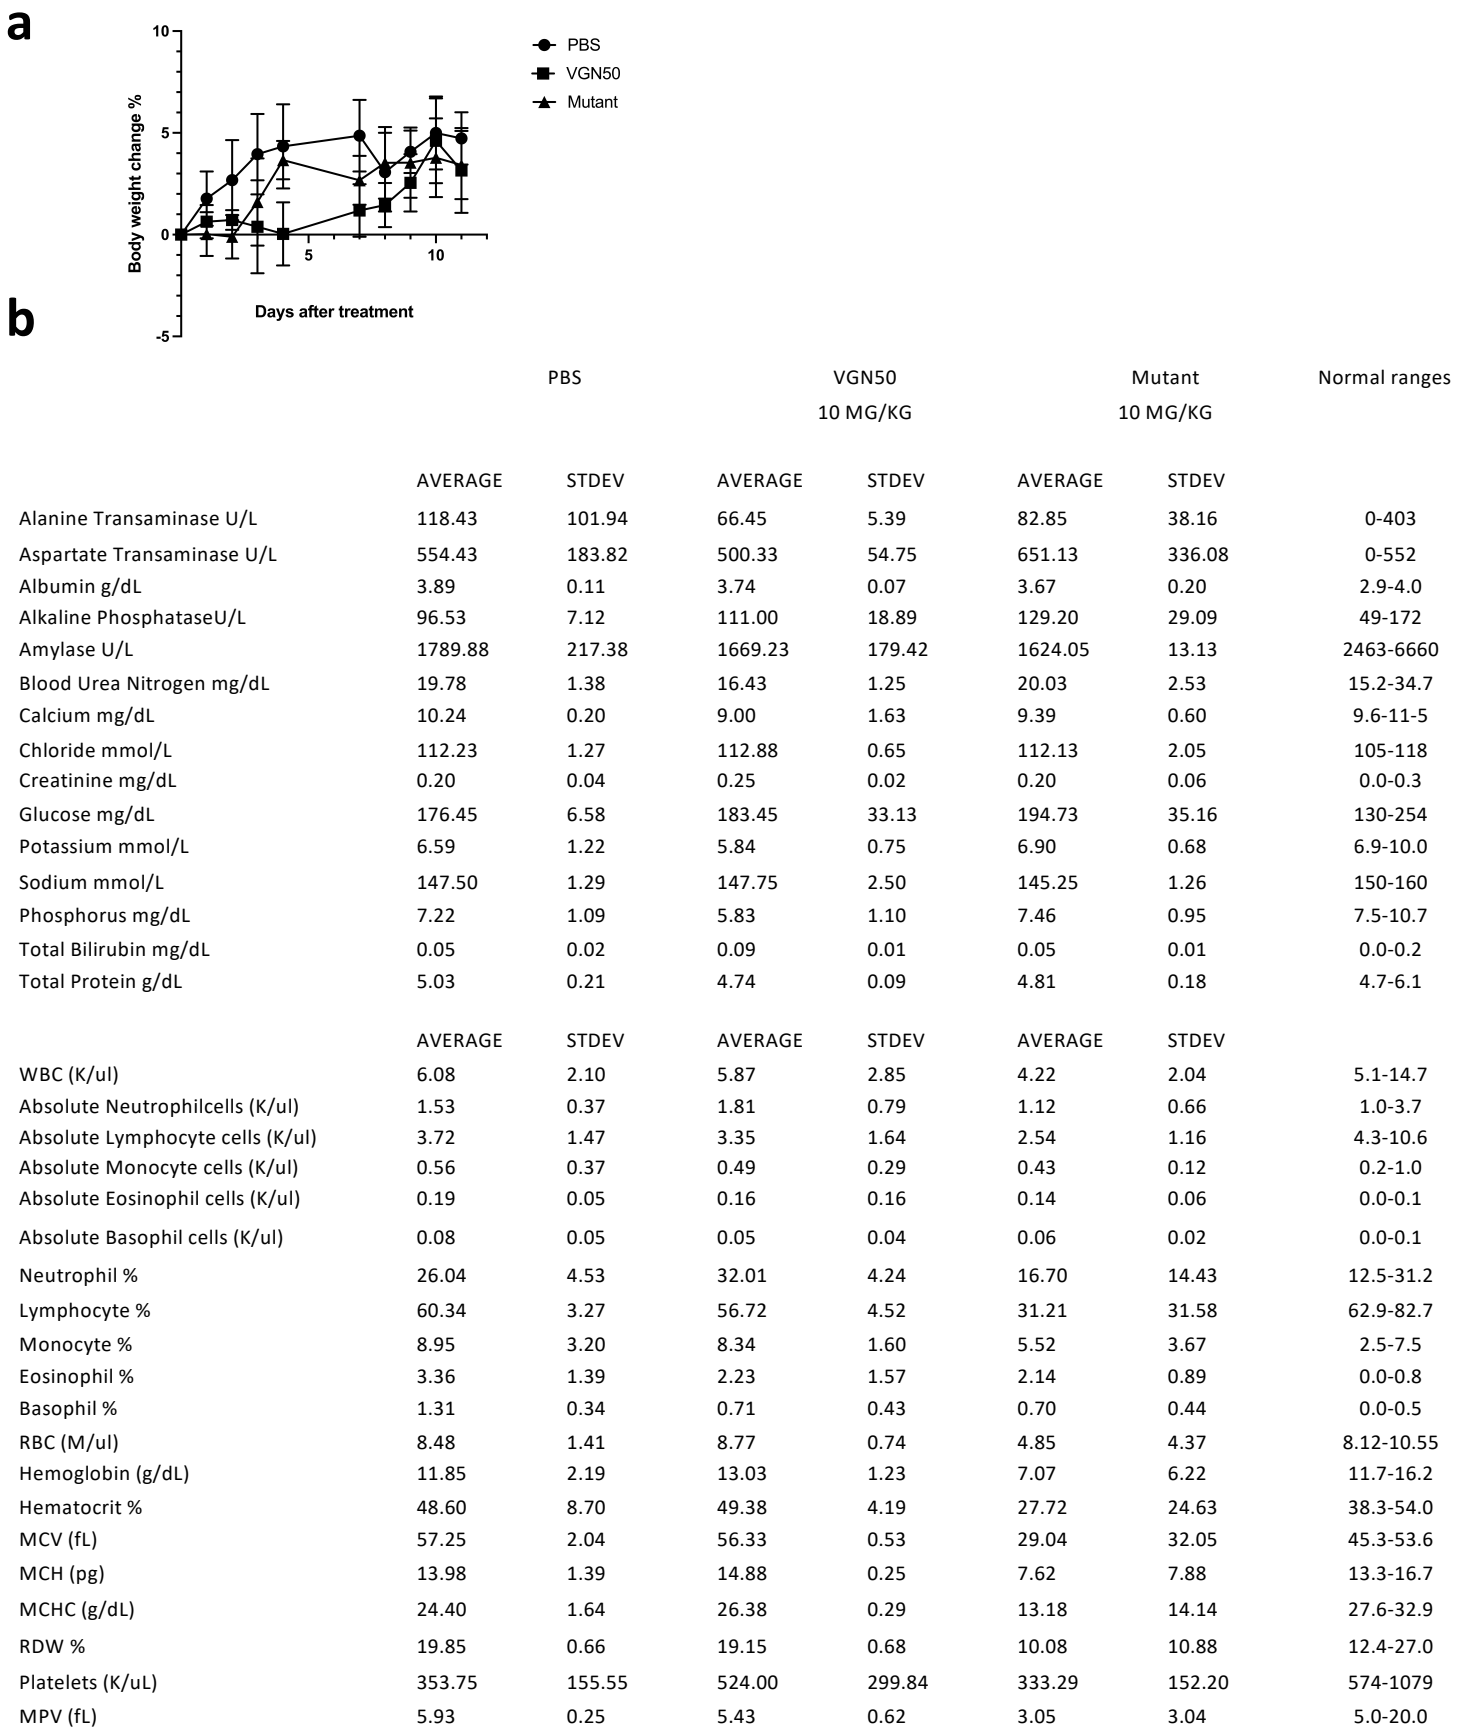

**Extended Data Figure 5.** BALB/c mice (8 weeks old, female, n=5/group) were injected with 10mg/kg of VGN50 or mutant peptide in 200  $\mu$ L i.p. with a 5 day-on 2 day off schedule for two weeks. Body weight changes were measured daily (a). At the end of the experiment, fresh blood and serum collected were subjected for complete blood counts and serum biochemical properties, respectively (b).

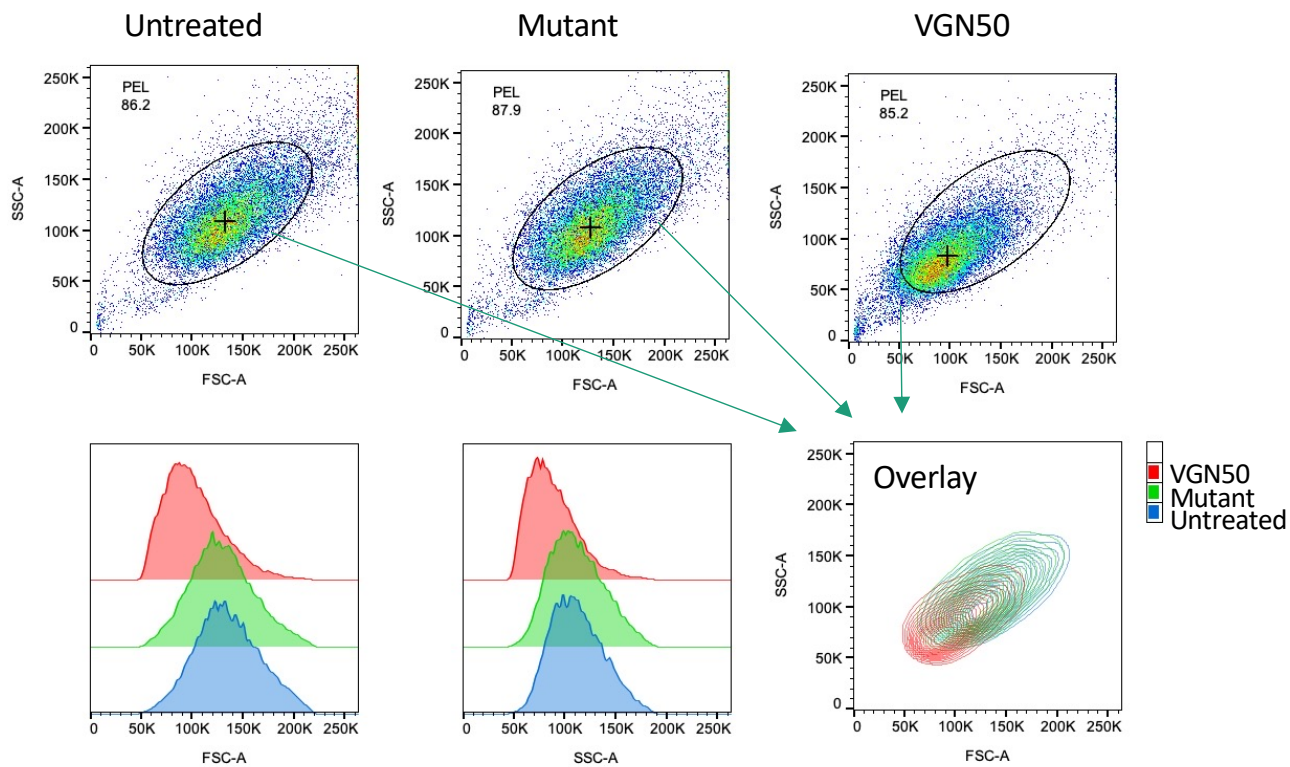

**S-Figure 6. Cell atrophy by VGN50.** A PEL gate was set based on FSC-A and SSC-A and applied for each ascites sample with a different treatment. A representative overlay FACS plot and histograms for FSC-A and SSC-A are shown. Mean geometric fluorescent intensity (gMFI) +/- SD for FSC-A and SSC-A are shown in Fig. 6C.

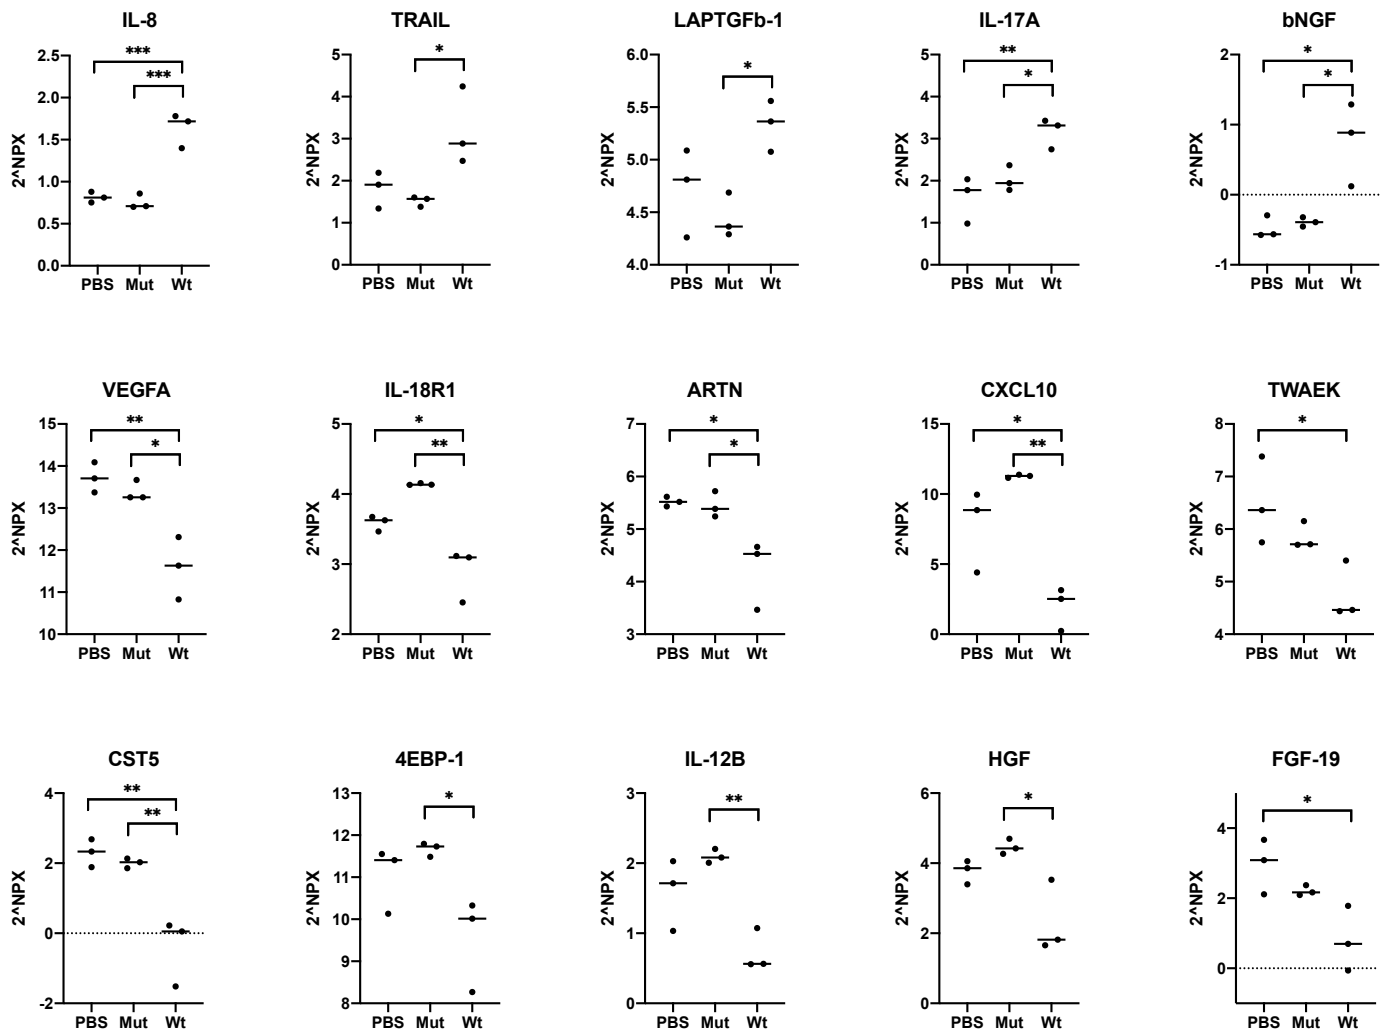

**S-Figure 7.** Ascites cytokines were measured by Olink assay using inflammatory cytokine panel as shown in STable. Among 92 cytokines, 15 cytokines significantly changed between the groups are shown. \* <math>< 0.05</math>, \*\* <math>< 0.01</math>, \*\*\* <math>< 0.001</math>.



|    | GS                                 | NES  | NOM p-val | FDR q-val |
|----|------------------------------------|------|-----------|-----------|
| 1  | HALLMARK_TNFA_SIGNALING_VIA_NFKB   | 1.74 | 0.001     | 0.034     |
| 2  | HALLMARK_ESTROGEN_RESPONSE_EARLY   | 1.69 | 0.001     | 0.036     |
| 3  | HALLMARK_G2M_CHECKPOINT            | 1.58 | 0.000     | 0.068     |
| 4  | HALLMARK_MITOTIC_SPINDLE           | 1.57 | 0.002     | 0.060     |
| 5  | HALLMARK_ALLOGRAFT_REJECTION       | 1.55 | 0.016     | 0.061     |
| 6  | HALLMARK_APOPTOSIS                 | 1.54 | 0.015     | 0.055     |
| 7  | HALLMARK_E2F_TARGETS               | 1.51 | 0.001     | 0.066     |
| 8  | HALLMARK_INTERFERON_GAMMA_RESPONSE | 1.48 | 0.021     | 0.071     |
| 9  | HALLMARK_ESTROGEN_RESPONSE_LATE    | 1.47 | 0.020     | 0.068     |
| 10 | HALLMARK_IL2_STAT5_SIGNALING       | 1.39 | 0.065     | 0.128     |
| 11 | HALLMARK_MTORC1_SIGNALING          | 1.37 | 0.048     | 0.137     |
| 12 | HALLMARK_MYC_TARGETS_V1            | 1.36 | 0.053     | 0.138     |

**S-Figure 8. Total RNA-seq of long-term treated xenograft BCBL-1 cells.** Xenograft BCBL-1 cells were isolated from ascites fluid and total RNA was extracted and sequenced. Results of GSEA over mutant peptide treated samples is presented in Table (N=3/group).

**Fig. 1c**

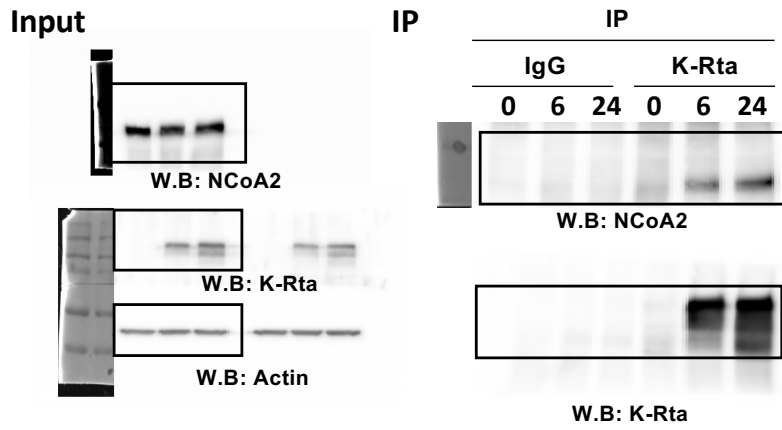

**Fig. 1g**

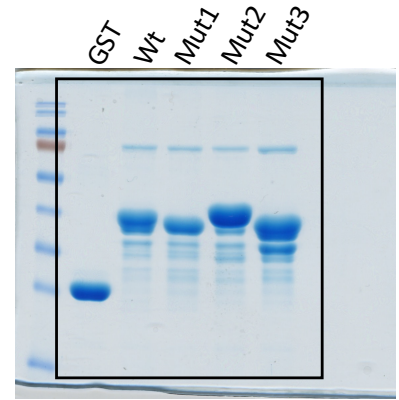

**Fig. 1g**

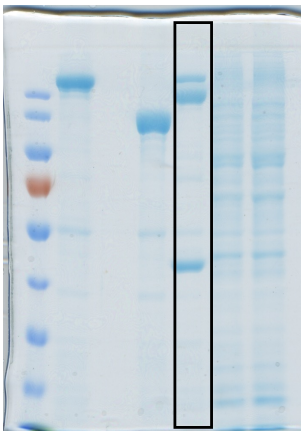

**Fig. 1h**

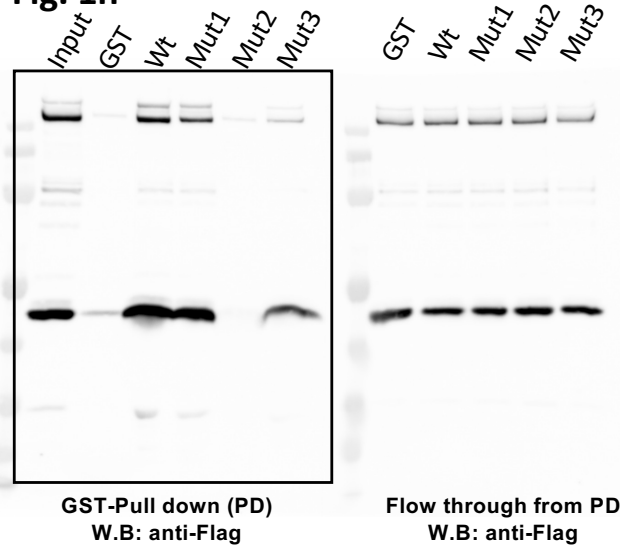

**Fig. 3b**

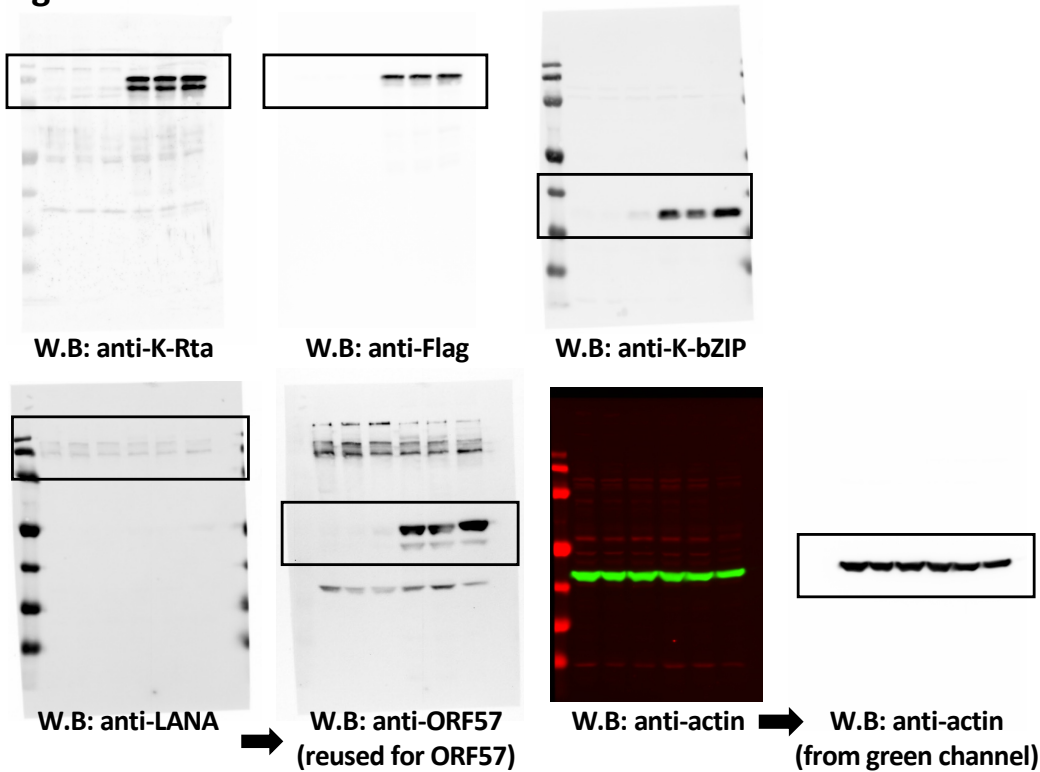

**Fig. 5d**

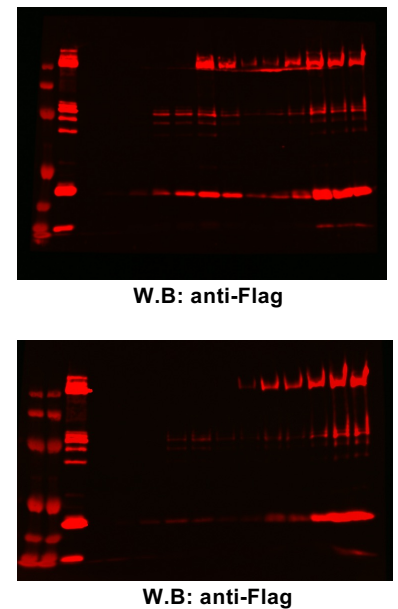

Supplement: 42003_2021_2853_MOESM2_ESM.pdf [file 42003_2021_2853_MOESM2_ESM.pdf]
