# Supplementary material for: KSHV transactivator-derived small peptide traps coactivators to attenuate MYC and inhibits leukemia and lymphoma cell growth
Source: PubMed Central journal article supplement (PMC8639922; doi:10.1038/s42003-021-02853-0), 2021-12-02
Supplement: 42003_2021_2853_MOESM3_ESM.pdf [file 42003_2021_2853_MOESM3_ESM.pdf]

## Description of Additional Supplementary Files

**File name:** Supplementary Data 1

**Description:** RIME Data sets.

**File name:** Supplementary Data 2

**Description:** BCBL-1 SLAM-seq DEseq down regulated p-adj<0.05 and -2 fold.

**File name:** Supplementary Data 3

**Description:** BC-1 SLAM-seq DEseq down regulated p-adj<0.01 and -2 fold.

**File name:** Supplementary Data 4

**Description:** BCBL-1&BC-1 SLAM-seq DEseq Upregulated, p-adj<0.05, 2-fold.

**File name:** Supplementary Data 5

**Description:** Cytokine list.

**File name:** Supplementary Data 6

**Description:** Primer sequences.

**File name:** Supplementary Data 7

**Description:** Source data for graph and chart presented in main figures.
